# Supplementary material
Source: HighWire-hosted journal article supplement (https://www.annfammed.org/highwire/filestream/7526/field_highwire_adjunct_files/2/Fleming_Suppl_table.pdf)
Supplement: Fleming_Suppl_table.pdf [file Fleming_Suppl_table.pdf]

Online Supplementary Material

Grossberg PM, Brown DD, Fleming MF. Brief physician advice for high-risk drinking among young adults. *Ann Fam Med*. 2004;2:474-480.

<http://www.annfammed.org/cgi/content/full/2/5/474/DC1>

**Supplemental Table. Description of Patient Sample That Participated in the Trial (N = 226)**

| Characteristics            | Experimental<br>(n = 114)<br>% (n) | Control<br>(n = 112)<br>% (n) | Total<br>(n = 226)<br>% (n) |
|----------------------------|------------------------------------|-------------------------------|-----------------------------|
| Sex                        |                                    |                               |                             |
| Male                       | 43 (49)                            | 54 (61)                       | 49 (110)                    |
| Female                     | 57 (65)                            | 46 (51)                       | 51 (116)                    |
| Age, years                 |                                    |                               |                             |
| 18-21                      | 16 (18)                            | 27 (30)                       | 21 (48)                     |
| 22-25                      | 31 (35)                            | 32 (36)                       | 37 (71)                     |
| 26-30                      | 53 (61)                            | 41 (46)                       | 47 (107)                    |
| Education                  |                                    |                               |                             |
| <8 years                   | 0 (0)                              | 3 (3)                         | 1 (3)                       |
| 8-12 years                 | 37 (42)                            | 30 (33)                       | 33 (75)                     |
| Some college               | 39 (44)                            | 45 (51)                       | 42 (95)                     |
| Complete college           | 12 (13)                            | 9 (10)                        | 10 (23)                     |
| Postgraduate               | 11 (12)                            | 10 (11)                       | 10 (23)                     |
| Marital status             |                                    |                               |                             |
| Never married              | 50 (57)                            | 64 (72)                       | 65 (129)                    |
| Separated                  | 1 (1)                              | 2 (2)                         | 1 (3)                       |
| Married                    | 33 (38)                            | 26 (29)                       | 29 (67)                     |
| Living with partner        | 4 (5)                              | 3 (5)                         | 3 (10)                      |
| Divorced                   | 9 (10)                             | 5 (5)                         | 7 (15)                      |
| Household size             |                                    |                               |                             |
| 1                          | 11 (12)                            | 6 (7)                         | 9 (19)                      |
| 2                          | 22 (24)                            | 22 (24)                       | 22 (48)                     |
| 3-4                        | 50 (55)                            | 59 (64)                       | 55 (119)                    |
| 5-6                        | 17 (18)                            | 13 (14)                       | 15 (32)                     |
| Ethnicity                  |                                    |                               |                             |
| White                      | 89 (100)                           | 83 (92)                       | 86 (192)                    |
| African American           | 4 (4)                              | 5 (6)                         | 5 (10)                      |
| Hispanic                   | 2 (2)                              | 2 (2)                         | 2 (4)                       |
| Other                      | 4 (4)                              | 6 (7)                         | 5 (11)                      |
| Income                     |                                    |                               |                             |
| <\$5000                    | 6 (6)                              | 9 (10)                        | 8 (16)                      |
| \$5000-\$10,000            | 8 (8)                              | 11 (12)                       | 9 (20)                      |
| \$10,000-\$15,000          | 12 (13)                            | 14 (15)                       | 13 (28)                     |
| \$15,000-\$20,000          | 21 (23)                            | 11 (12)                       | 16 (35)                     |
| \$20,000-\$30,000          | 22 (24)                            | 25 (27)                       | 24 (51)                     |
| \$40,000-\$75,000          | 9 (10)                             | 6 (8)                         | 9 (18)                      |
| Cigarette use              | 67 (76)                            | 58 (65)                       | 62 (141)                    |
| Mental health              |                                    |                               |                             |
| Adult conduct disorder     | 18 (20)                            | 13 (14)                       | 15 (34)                     |
| Childhood conduct disorder | 17 (19)                            | 17 (17)                       | 17 (38)                     |
| Depression in last 30 days | 22 (25)                            | 21 (23)                       | 21 (48)                     |
| Lifetime depression        | 41 (47)                            | 36 (40)                       | 38 (87)                     |
